# Supplementary material for: Disulfide-phenylazide: a reductively cleavable photoreactive linker for facile modification of nanoparticle surfaces
Source: Royal Society of Chemistry journal article supplement (doi:10.1039/c2tb00420h), 2012-12-18

## Supporting Information

### Disulfide-phenylazide: a reductively cleavable photoreactive linker for facile modification of nanoparticles surface

Qi Huang, Chunyan Bao,\* Yao Lin, Jian Chen, Zhenzhen Liu, and Linyong Zhu\*

Shanghai Key Laboratory of Functional Materials Chemistry, Institute of Fine Chemicals, East China University of Science and Technology, Shanghai 200237, P. R. China China. Fax: (+86)-21-64253451

E-mail: [baochunyan@ecust.edu.cn](mailto:baochunyan@ecust.edu.cn); [linyongzhu@ecust.edu.cn](mailto:linyongzhu@ecust.edu.cn)

- <sup>1</sup>H NMR spectra for compounds **2**, **3** and SPA.

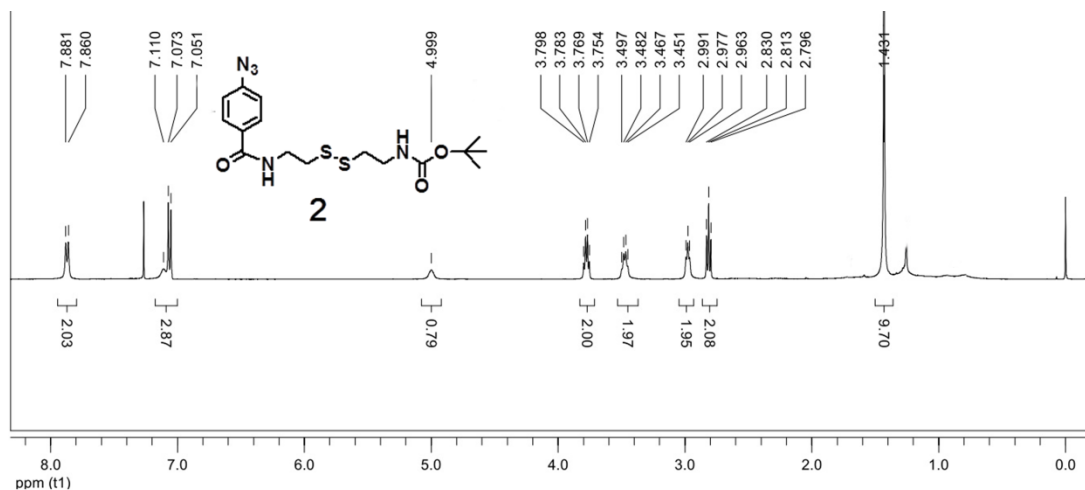

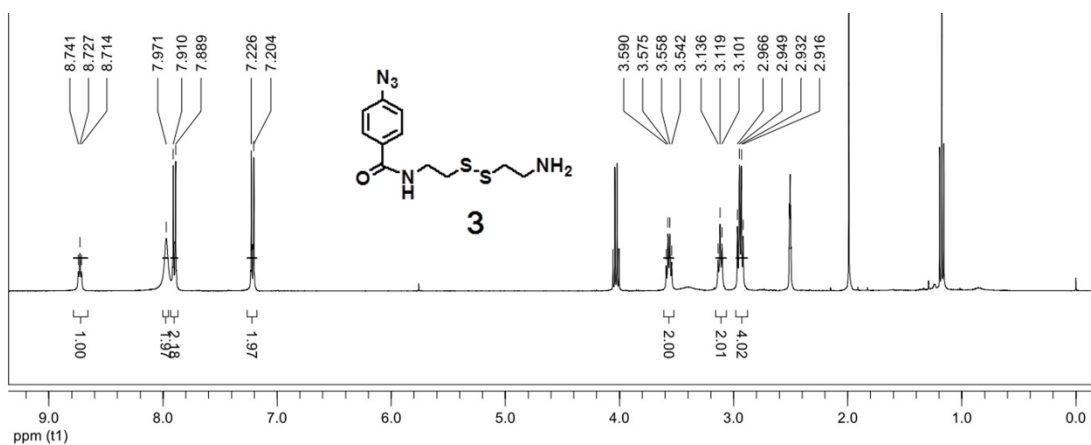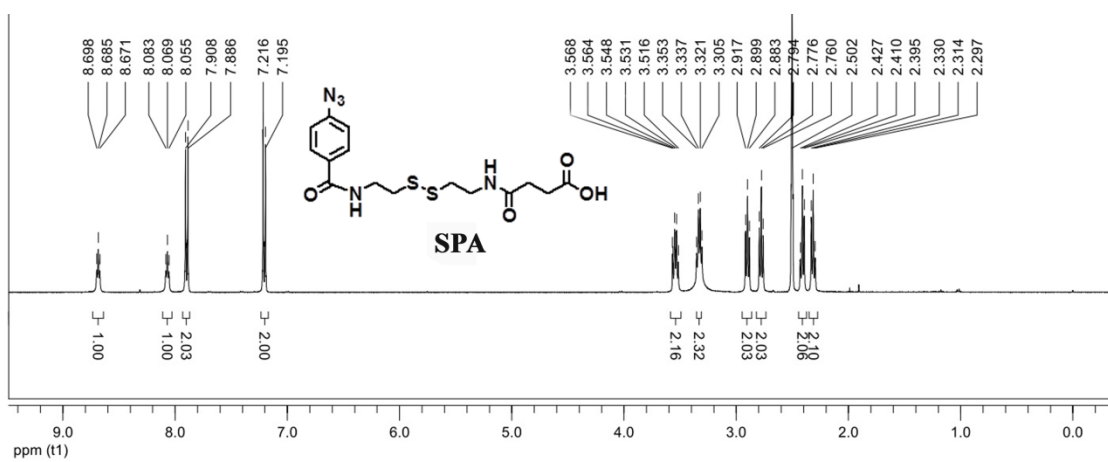

Supplement: c2tb00420h.pdf [file c2tb00420h.pdf]
